# Supplementary material for: Sexual Complexity: A Comparison between Men and Women in a Sexual Minority Sample of Members of the Church of Jesus Christ of Latter-day Saints
Source: MDPI journal article supplement (doi:10.3390/rel13060561), 2022-06-17
Supplement: s1 [file s1]

**Table S1.** Survey Sources.

| Source (Category)          | Sex               |                  |                  |                 |
|----------------------------|-------------------|------------------|------------------|-----------------|
|                            | Males # (%)       |                  | Females # (%)    |                 |
|                            | All               | Active           | All              | Active          |
| [No. Reporting A Source]   | 1161 <sup>1</sup> | 357 <sup>2</sup> | 363 <sup>3</sup> | 77 <sup>4</sup> |
| Social Media:              | 399 (34.4)        | 97 (27.2)        | 133 (36.6)       | 22 (28.5)       |
| Facebook, Twitter          | 17                | 8                | 6                |                 |
| Email                      | 382               | 89               | 127              | 22              |
| Newspapers, Radio:         | 219 (18.9)        | 72 (20.2)        | 55 (15.2)        | 12 (15.6)       |
| SLTrib                     | 14                | 6                | 4                |                 |
| D. News, Logan Herald J.   | 5                 | 2                | 2                |                 |
| KSL                        | 31                | 12               | 9                | 3               |
| Misc.                      | 169               | 52               | 40               | 9               |
| LDS LGBT Sites:            | 222 (19.1)        | 72 (20.2)        | 40 (11.0)        | 10 (13.0)       |
| Affirmation                | 89                | 18               | 29               | 8               |
| Cor Invictus               | 55                | 31               | 3                |                 |
| Q Saints                   | 16                | 2                | 3                |                 |
| Mo Ho                      | 10                | 6                |                  | 1               |
| Cha-Cha Brotherhood        | 10                | 4                |                  |                 |
| Q Salt Lake                | 7                 |                  |                  |                 |
| Ohana News                 | 19                |                  |                  |                 |
| Others <sup>5</sup>        | 16                | 11               | 5                | 1               |
| LDS-Affinity LGBT Sites:   | 79 ( 6.8)         | 61 (17.1)        | 10 ( 2.8)        | 8 (10.4)        |
| Northstar                  | 49                | 43               |                  |                 |
| USGA                       | 9                 | 6                | 8                | 6               |
| Evergreen                  | 6                 | 5                | 2                | 2               |
| Disciples                  | 4                 | 3                |                  |                 |
| Gamophites                 | 4                 | 2                |                  |                 |
| Reconciliation             | 3                 | 2                |                  |                 |
| Advocacy/Support Groups:   | 75 ( 6.4)         | 9 ( 2.5)         | 45 (12.4)        | 4 (5.2)         |
| SLC Pride Center           | 43                | 7                | 31               | 3               |
| Family Fellowship          | 24                | 1                | 8                |                 |
| Equality Utah              | 5                 | 1                | 6                | 1               |
| PFLAG                      | 3                 |                  |                  |                 |
| LDS Audience Sites:        | 62 ( 5.3)         | 24 ( 6.7)        | 32 ( 8.8)        | 11 (14.3)       |
| Mormon Stories             | 45                | 17               | 21               | 6               |
| Mormons For Marriage       | 10                | 3                | 9                | 4               |
| Times and Seasons          | 3                 | 3                | 1                | 1               |
| Joanna Brooks/ Main St. P. | 4                 | 3                | 1                |                 |
| Online:                    | 20 ( 1.7)         | 8 ( 2.2)         | 4 ( 1.1)         | 2 (2.6)         |

|                     |           |           |           |         |
|---------------------|-----------|-----------|-----------|---------|
| Blogs               | 7         | 5         | 2         |         |
| Unspecified         | 13        | 3         | 2         | 2       |
| Word of Mouth:      | 42 ( 3.6) | 12 ( 3.4) | 18 ( 5.0) | 4 (5.2) |
| Friends             | 20        | 5         | 7         |         |
| Family              | 16        | 2         | 9         | 2       |
| Therapist           | 5         | 5         | 2         | 1       |
| Church Leader       | 1         |           |           | 1       |
| General Gay Sites:  | 24 ( 2.1) | 2 (0.7)   | 19 ( 5.2) | 3 (3.9) |
| Autostraddle        |           |           | 11        |         |
| Connexion           | 7         | 1         |           |         |
| Towler Road         | 5         | 1         |           |         |
| University groups   | 3         |           | 1         |         |
| Others <sup>6</sup> | 9         |           | 7         | 3       |
| X-Mormon            | 19 ( 1.6) |           | 7( 1.9)   | 1 (1.3) |

<sup>1</sup> 95.2 % of total

<sup>2</sup> 98.3 % of total

<sup>3</sup> 93.8 % of total

<sup>4</sup> 98.7 % of total

<sup>5</sup> Dottie Dixon, Far Between, Invictus Pilgrim, New Order Mormon, Ohana News, Spicy Dinner Group, UT Gay Fathers

<sup>6</sup> Advocate, Mankind Project, RealClearReligion.org, Cultural News Net
